# Supplementary material for: Remarkable substitution influence on the mechanochromism of cyanostilbene derivatives
Source: Royal Society of Chemistry journal article supplement (doi:10.1039/c6ra14707k), 2016-01-01
Supplement: c6ra14707k1.pdf [file c6ra14707k1.pdf]

**Electronic Supplementary Information**

# Remarkable Substitution Influence on the Mechanochromism of Cyanostilbene Derivatives

He Zhao,<sup>a</sup> Yongtao Wang,<sup>\*a</sup> Steven Harriangton,<sup>b</sup> Lei Ma,<sup>\*b</sup> Shuzhi Hu,<sup>\*c</sup> Xue Wu,<sup>d</sup>  
Huan Tang,<sup>a</sup> Mei Xue,<sup>a</sup> and Yubin Wang<sup>a</sup>

<sup>a</sup> School of Chemistry and Chemical Engineering, Engineering research center of materials-oriented chemical engineering of Xinjiang Bingtuan/Key Laboratory of materials-oriented chemical engineering of Xinjiang Uygur Autonomous Region, Shihezi University, Shihezi, Xinjiang 832003, P. R. China.

<sup>b</sup> Tianjin International Center of nanoparticles and nanosystem, Tianjin University, Tianjin, 300072, P. R. China.

<sup>c</sup> Key lab for fuel cell technology of Guangdong Province, Guangdong, School of Chemistry and Chemical Engineering, South China University of Technology, Guangzhou, 510640, P. R. China.

<sup>d</sup> Key Laboratory of Materials Modification by Laser, Ion and Electron Beams (Dalian University of Technology), Ministry of Education, Dalian 116024, China

## Table of Contents

### Experimental Section

Scheme S1. Synthetic routes of target compounds 2a-2e.

Fig. S1. <sup>1</sup>H NMR spectra of 2a

Fig. S2. <sup>13</sup>C NMR spectra of 2a.

Fig. S3. (A) LRMS and (B) HRMS spectra of 2a.

Fig. S4. <sup>1</sup>H NMR spectra of 2b.

Fig. S5. <sup>13</sup>C NMR spectra of 2b

Fig. S6. (A) LRMS and (B) HRMS spectra of 2b.

Fig. S7. <sup>1</sup>H NMR spectra of 2c.

Fig. S8. <sup>13</sup>C NMR spectra of 2c.

Fig. S9. (A) LRMS and (B) HRMS spectra of 2c.

Fig. S10. <sup>1</sup>H NMR spectra of 2d.

Fig. S11. <sup>13</sup>C NMR spectra of 2d.

Fig. S12. LRMS spectra of 2d.

Fig. S13. HRMS spectra of 2d.

Fig. S14. <sup>1</sup>H NMR spectra of 2e.

Fig. S15. <sup>13</sup>C NMR spectra of 2e

Fig. S16. LRMS spectra of 2e.

Fig. S17. HRMS spectra of 2e.

Fig. S18. Normalised (A) absorption and (B) emission spectra of 2a in various organic solvents.

Fig. S19. Normalised (A) absorption and (B) emission spectra of 2b in various organic solvents.

Fig. S20. Normalised (A) absorption and (B) emission spectra of 2c in various organic solvents.

Fig. S21. Normalised (A) absorption and (B) emission spectra of 2d in various organic solvents.

Fig. S22. Fluorescent emission spectra of the as-prepared 2a-2e and photographs of the powder of the as-prepared 2a-2e under 365 nm UV light.

Table S1 Photophysical properties of 2a-2e.

Fig. S23. B3LYP/6-31G (d, p) calculated molecular orbital amplitude plots of HOMO and LUMO levels for 2a-2d.

Fig. S24. (A) Emission spectra of 2a in THF and THF/water mixtures with varying water fractions ( $f_w$ ). (B) Plots of fluorescence peak location and intensity vs  $f_w$  for 2a. Concentration = 20  $\mu$ M; excitation wavelength = 360 nm.

Fig. S25. (A) Emission spectra of 2b in THF and THF/water mixtures with varying water fractions ( $f_w$ ). (B) Plots of fluorescence peak location and intensity vs  $f_w$  for 2b. Concentration = 20  $\mu$ M; excitation wavelength = 360 nm.

Fig. S26. (A) Emission spectra of 2c in THF and THF/water mixtures with varying water fractions ( $f_w$ ). (B) Plots of fluorescence peak location and intensity vs  $f_w$  for 2c. Concentration = 20  $\mu$ M; excitation wavelength = 360 nm.

Fig. S27. (A) Emission spectra of 2d in THF and THF/water mixtures with varying water fractions ( $f_w$ ). (B) Plots of fluorescence peak location and intensity vs  $f_w$  for 2d. Concentration = 20  $\mu$ M; excitation wavelength = 360 nm.

Fig. S28. (A) Emission spectra of 2a in THF and THF/water mixtures with varying water fractions ( $f_w$ ) and kept at room temperature above 2 h. (B) Plots of fluorescence peak location and intensity vs  $f_w$  for 2a. Concentration = 20  $\mu$ M; excitation

wavelength = 360 nm.

Fig. S29. (A) Emission spectra of 2b in THF and THF/water mixtures with varying water fractions ( $f_w$ ) and kept at room temperature above 2 h. (B) Plots of fluorescence peak location and intensity vs  $f_w$  for 2b. Concentration = 20  $\mu$ M; excitation wavelength = 360 nm.

Fig. S30. (A) Emission spectra of 2c in THF and THF/water mixtures with varying water fractions ( $f_w$ ) and kept at room temperature above 2 h. (B) Plots of fluorescence peak location and intensity vs  $f_w$  for 2c. Concentration = 20  $\mu$ M; excitation wavelength = 360 nm.

Fig. S31. (A) Emission spectra of 2d in THF and THF/water mixtures with varying water fractions ( $f_w$ ) and kept at room temperature above 2 h. (B) Plots of fluorescence peak location and intensity vs  $f_w$  for 2d. Concentration = 20  $\mu$ M; excitation wavelength = 360 nm.

Fig. S32. Emission maxima of 2e during the grinding-annealing cycles. As = as prepared sample, G = ground sample; An= Annealing sample (annealing at 60  $^{\circ}$ C for 10 min). The numbers after G or An represent cycle numbers.

Fig. S33. (A) Emission spectra of the as-prepared, ground and annealing 2a solids, (D) their XRD patterns and (B and C) their photographs taken under UV illumination.

Fig. S34. Emission maxima of 2a during the grinding-annealing cycles. As = as prepared sample, G = ground sample; An= Annealing sample (annealing at 60  $^{\circ}$ C for 10 min). The numbers after G or An represent cycle numbers.

Fig. S35. (A) Emission spectra of the as-prepared, ground and annealing 2d solids, (D) their XRD patterns and (B and C) their photographs taken under UV illumination.

Fig. S36. Emission maxima of 2d during the grinding-annealing cycles. As = as prepared sample, G = ground sample; An= Annealing sample (annealing at 60  $^{\circ}$ C for 10 min). The numbers after G or An represent cycle numbers.

Fig. S37. XRD patterns of the as-prepared and ground 2b (A) and 2c (B) solids.

Fig. S38. TGA and DSC (inset) thermograms of 2a (A) and 2b (B) recorded under nitrogen atmosphere at the heating rate of 10  $^{\circ}$ C  $\text{min}^{-1}$ .

Fig. S39. (A) TGA thermograms of 2c recorded under nitrogen atmosphere at 10 °C min<sup>-1</sup> scan rates. (B) DSC curve of the as-prepared 2c.

Fig. S40. (A) TGA thermograms of 2d recorded under nitrogen atmosphere at 10 °C min<sup>-1</sup> scan rates. (B) DSC curve of the as-prepared 2d.

Table S2. Crystal data and structure refinement for 2a.

Table S3. Crystal data and structure refinement for 2b.

Table S4. Crystal data and structure refinement for 2c.

Table S5. Crystal data and structure refinement for 2d.

Table S6. Crystal data and structure refinement for 2e.

## Experimental Section

### Chemicals and instruments

All the reagents were obtained from commercial sources and used without further purification. The organic solvents were of analytical grade quality and all were dried by traditional methods. In general, all the intermediates and final compounds were purified by column chromatography on silica gel (200-300 mesh), and crystallization from analytical grade solvents. Reactions were monitored by using thin layer chromatography (TLC) (Qingdao Jiyida silica gel reagent factory GF254).

<sup>1</sup>H NMR spectra was obtained with a Varian inova-400-MHz instrument using tetramethylsilane (TMS) as the internal standard. <sup>13</sup>C NMR spectra were recorded on a Varian inova-100-MHz spectrometer. ESI/MS spectra were obtained on a Waters GCT Premier. MALDI/HRMS was obtained on a UltrafleXtreme MALDI-TOF/TOF mass spectrometer (Bruker, Germany). A MaPada UV-3200PCS spectrophotometer was used to record absorption spectra. Fluorescence spectra was recorded on a Hitachi F-2500 and solution fluorescence quantum yield was estimated by using 9,10-diphenylanthracen as standard ( $\Phi_F = 90\%$  in cyclohexane). Solid-state efficiencies were determined using a FLS920 Fluorescence Lifetime and Steady State Spectroscopy with the excitation wavelength of 365 nm. The ground-state geometries were optimized using the density functional with B3LYP hybrid functional at the basis set level of 6-31G(d). All calculations were performed using the Gaussian 09 package. Single-crystal X-ray diffraction intensity data were collected on a Bruker–Nonices Smart Apex CCD diffractometer with graphite-monochromated Mo-K $\alpha$  radiation. Processing of the intensity data was carried out using the SAINT and SADABS routines, and the structure and refinement were conducted using the SHELTL suite of X-ray programs (version 6.10). Glass transition temperature was determined by DSC measurements carried out using Netzsch Gerätebau GmbH R.O. Thermal stability was determined by thermogravimetric analyzer (TGA, Netzsch STA449F3) over a temperature range of 25-1000 °C at a heating rate of 10 °C min<sup>-1</sup> under a nitrogen atmosphere. Powder XRD measurements were conducted on D8 Advance (Bruker) with Cu K $\alpha$  radiation in the range 10° < 2 $\theta$  < 90°. Digital photographs were taken by Canon 550D (Canon, Japan) digital cameras.

## Synthesis

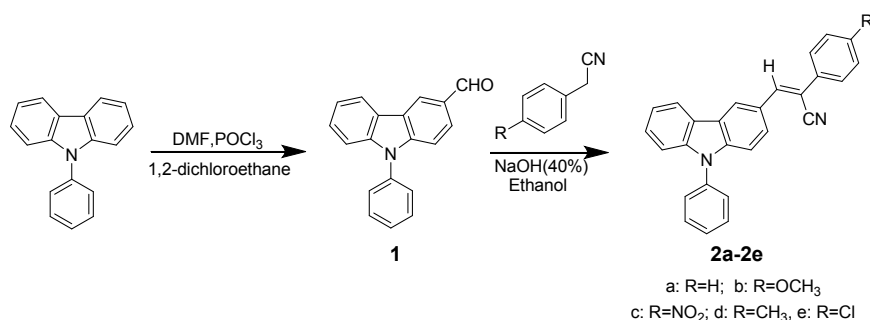

Scheme S1. Synthetic routes of target compounds 2a-2e.

### Synthesis of 9-phenyl-9H-carbazole-3-carbaldehyde<sup>1</sup> (1)

The phosphorus oxychloride (POCl<sub>3</sub>) was added dropwise to a stirred DMF solution at 0 °C. Then the temperature reached 20 °C, 1,2-dichloroethane solution of 9-phenyl-9H-carbazole was added dropwise to the stirred mixture solution. After the addition the mixture was refluxed with stirring for 7 h. The reaction was quenched by addition of ice water and extraction with CH<sub>2</sub>Cl<sub>2</sub> (3×50 mL). The combined ethereal extracted was dried over anhydrous Na<sub>2</sub>SO<sub>4</sub> and evaporated to dryness to leave a colorless residue, further purification by silica gel column chromatography (petroleum ether (PE) : ethyl acetate (EA) = 10:1, v/v) to give a white solid (yield 80%) : m.p. 100.5-100.6 °C.

### 2.2.2 Procedures for the synthesis of 2a-2e<sup>2,3</sup>

*(Z)*-2-phenyl-3-(9-phenyl-9H-carbazol-3-yl)acrylonitrile (2a): A mixture of the 9-phenyl-9H-carbazole-3-carbaldehyde (7.38 mmol) and benzyl cyanide (7.38 mmol) was dissolved in 3 mL anhydrous ethanol. Then a 40% solution of sodium hydroxide (0.5 mL) was added into the reaction mixture. The mixture was stirred at room temperature for 12 h. After the reaction finished, the ice methanol was added dropwise to a stirred mixture solution. The pale yellow crystals formed was isolated by filtration and dried at 60 °C. Yield: 95%; m.p. 95.1-95.3 °C; <sup>1</sup>H NMR (DMSO-*d*<sub>6</sub>, 400 MHz): δ (ppm) 8.84 (d, *J* = 1.6 Hz, 1H), 8.24 (d, *J* = 7.6 Hz, 1H), 8.20 (s, 1H), 8.12 (dd, *J*<sub>1</sub> = 8.8 Hz, *J*<sub>2</sub> = 2.0 Hz, 1H), 7.84-7.76 (m, 2H), 7.75-7.69 (m, 2H), 7.68-7.64 (m, 2H), 7.61-7.47 (m, 5H), 7.47-7.35 (m, 3H). <sup>13</sup>C NMR (DMSO-*d*<sub>6</sub>, 400 MHz) δ (ppm) 144.07, 141.57, 141.30, 136.65, 134.76, 130.72, 129.62, 129.18, 128.58, 127.75, 127.50, 127.16, 126.36, 125.93, 123.38, 122.90, 122.87, 121.39, 120.95, 119.13, 110.61, 107.54. MS (ESI) *m/z* 371.2 [M+H]<sup>+</sup>, HRMS (MALDI-TOF): *m/z* 370.1465 [M<sup>+</sup>, calcd 370.1465].

*(Z)*-2-(4-methoxyphenyl)-3-(9-phenyl-9H-carbazol-3-yl)acrylonitrile (2b): Compound 2b was obtained from 2-(4-methoxyphenyl)acetonitrile and 1. Time: 10 h; yield: 98%; fluorescence yellow crystals; m.p. 157.4-157.6 °C; <sup>1</sup>H NMR (DMSO-*d*<sub>6</sub>, 400 MHz): δ (ppm) 8.79 (s, 1H), 8.23 (d, *J* = 7.6 Hz, 1H), 8.12-8.02 (m, 2H), 7.76-7.63 (m, 6H),

7.61-7.45 (m, 3H), 7.43-7.34 (m, 2H), 7.05 (d,  $J = 8.8$  Hz, 2H), 3.83 (s, 3H).  $^{13}\text{C}$  NMR (DMSO- $d_6$ , 400 MHz)  $\delta$  (ppm) 160.16, 141.85, 141.32, 141.25, 136.70, 130.70, 128.52, 127.53, 127.42, 127.31, 127.14, 126.62, 123.36, 122.92, 122.45, 121.31, 120.92, 119.23, 115.02, 110.54, 107.40, 55.79. MS (ESI)  $m/z$  423.3  $[\text{M}+\text{Na}]^+$ , HRMS (MALDI-TOF):  $m/z$  400.1561  $[\text{M}^+]$ , calcd 400.1570].

*(Z)*-2-(4-nitrophenyl)-3-(9-phenyl-9H-carbazol-3-yl)acrylonitrile (2c): Compound 2c was obtained from 2-(4-nitrophenyl)acetonitrile and 1. Time: 9 h; yield: 90%; orangered crystals; m.p. 200.7-200.9 °C;  $^1\text{H}$  NMR (DMSO- $d_6$ , 400 MHz):  $\delta$  (ppm) 8.90 (s, 1H) 8.42 (s, 1H) 8.34 (d,  $J = 8.8$  Hz, 2H) 8.23 (d,  $J = 7.6$  Hz, 1H) 8.17 (d,  $J = 8.4$  Hz, 1H) 8.05 (d,  $J = 8.8$  Hz, 2H) 7.75-7.57 (m, 5H) 7.55-7.47 (m, 2H) 7.45-7.35 (m, 2H)  $^{13}\text{C}$  NMR (DMSO- $d_6$ , 400 MHz)  $\delta$  (ppm) 147.01, 141.82, 141.12, 140.81, 136.15, 130.16, 128.16, 127.76, 126.70, 126.46, 125.39, 124.13, 123.08, 122.99, 122.44, 121.02, 120.36, 117.92, 110.21, 110.17, 105.03. MS (ESI)  $m/z$  416.2  $[\text{M}+\text{H}]^+$ , HRMS (MALDI-TOF):  $m/z$  415.1316  $[\text{M}^+]$ , calcd 415.1315].

*(Z)*-3-(9-phenyl-9H-carbazol-3-yl)-2-(p-tolyl)acrylonitrile (2d): Compound 2d was obtained from 2-(p-tolyl)acetonitrile and 1. Time: 48 h Yield: 90%; pale yellow crystals; m.p. 173.5-173.8 °C;  $^1\text{H}$  NMR ( $\text{CDCl}_3$ , 400 MHz):  $\delta$  (ppm) 8.69 (d,  $J = 2.0$  Hz, 1H), 8.22-8.17 (m, 1H), 8.00 (dd,  $J_1 = 8.4$  Hz,  $J_2 = 1.8$  Hz, 1H), 7.68 (s, 1H), 7.65-7.59 (m, 4H), 7.57-7.53 (m, 2H), 7.52-7.39 (m, 4H), 7.36-7.31 (m, 1H), 7.26 (d,  $J = 0.4$  Hz, 1H), 7.24 (d,  $J = 0.8$  Hz, 1H), 2.4 (s, 3H).  $^{13}\text{C}$  NMR ( $\text{CDCl}_3$ , 400 MHz)  $\delta$  (ppm) 142.23, 141.81, 141.53, 136.68, 137.02, 132.31, 130.00, 129.67, 127.93, 127.41, 127.01, 126.64, 126.02, 125.63, 123.73, 123.15, 122.03, 120.72, 120.65, 119.04, 110.15, 108.13, 21.19. MS (ESI)  $m/z$  385.5  $[\text{M}+\text{H}]^+$ , HRMS (MALDI-TOF):  $m/z$  384.1610  $[\text{M}^+]$ , calcd 384.1621].

*(Z)*-2-(4-chlorophenyl)-3-(9-phenyl-9H-carbazol-3-yl)acrylonitrile (2e): Compound 2e was obtained from 2-(4-chlorophenyl)acetonitrile and 1. Time: 10 h Yield: 90%; pale green crystals; m.p. 228.3-228.6 °C;  $^1\text{H}$  NMR ( $\text{CDCl}_3$ , 400 MHz):  $\delta$  (ppm) 8.70 (d,  $J = 1.6$  Hz, 1H) 8.19 (dd,  $J_1 = 8.0$  Hz,  $J_2 = 0.8$  Hz, 1H), 7.99 (dd,  $J_1 = 8.8$  Hz,  $J_2 = 2$  Hz, 1H), 7.67 (s, 1H), 7.66-7.58 (m, 4H), 7.57-7.38 (m, 8H), 7.36-7.31 (m, 1H).  $^{13}\text{C}$  NMR ( $\text{CDCl}_3$ , 400 MHz)  $\delta$  (ppm) 143.44, 142.14, 141.67, 136.99, 134.51, 133.75, 129.99, 129.14, 128.00, 127.51, 127.03, 126.96, 126.75, 125.62, 123.84, 123.12, 122.24, 120.83, 120.61, 118.54, 110.22, 110.20, 106.96. MS (ESI)  $m/z$  405.5  $[\text{M}+\text{H}]^+$ , HRMS (MALDI-TOF):  $m/z$  404.1064  $[\text{M}^+]$ , calcd 404.1075].

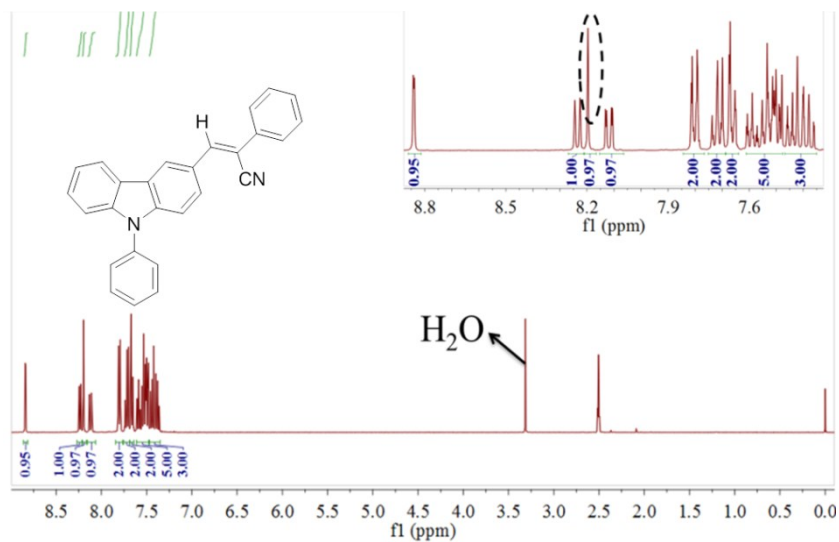

Fig. S1.  $^1\text{H}$  NMR spectra of 2a.

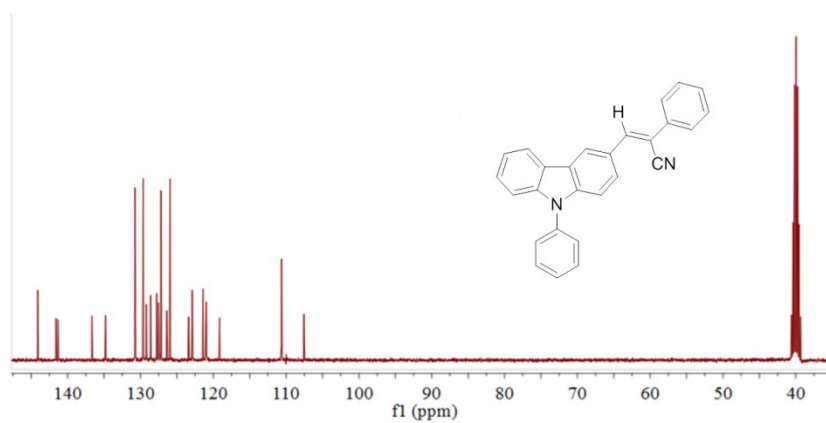

Fig. S2.  $^{13}\text{C}$  NMR spectra of 2a.

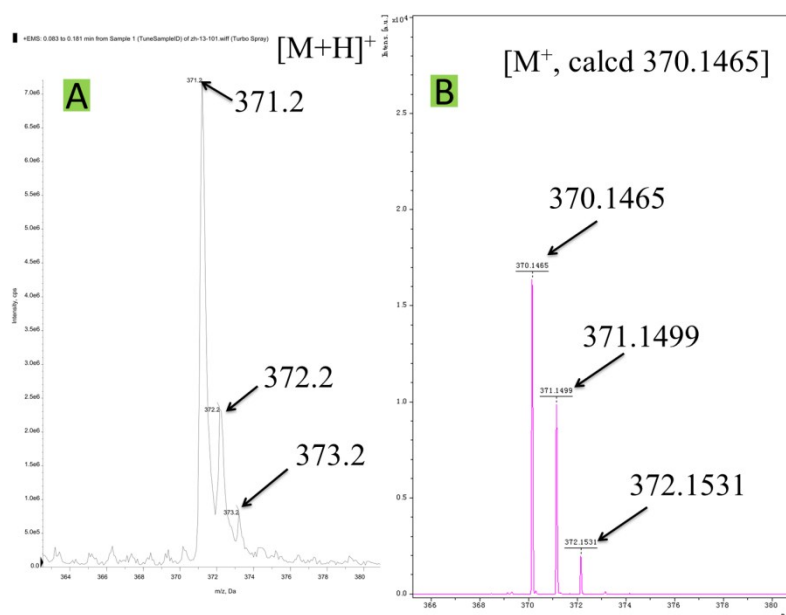

Fig. S3. (A) LRMS and (B) HRMS spectra of 2a.



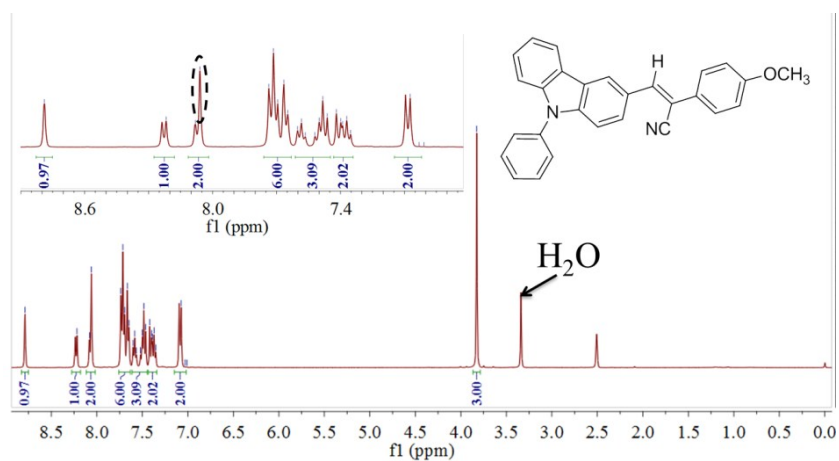

Fig. S4.  $^1\text{H}$  NMR spectra of 2b.

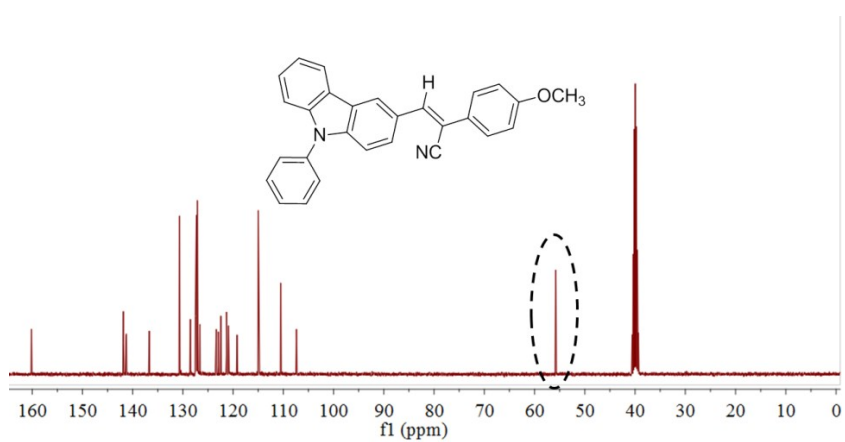

Fig. S5.  $^{13}\text{C}$  NMR spectra of 2b.

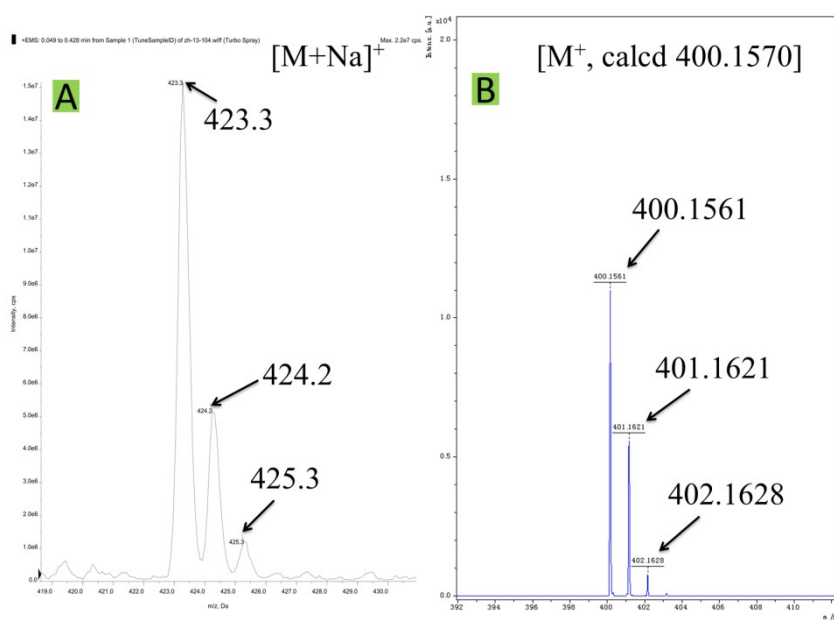

Fig. S6. (A) LRMS and (B) HRMS spectra of 2b.

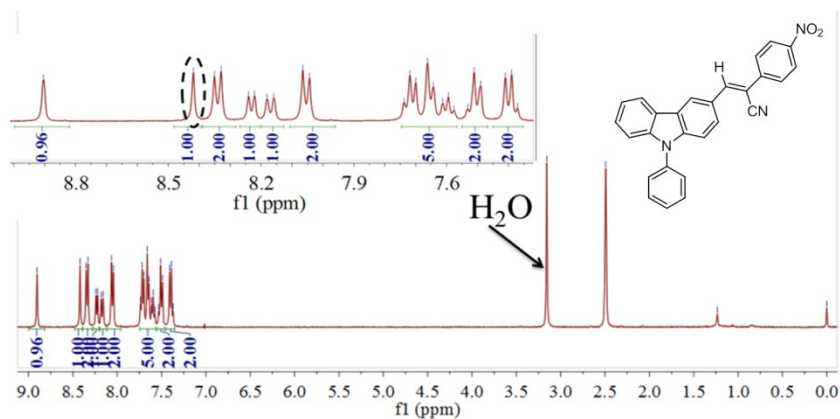

Fig. S7.  $^1\text{H}$  NMR spectra of 2c.

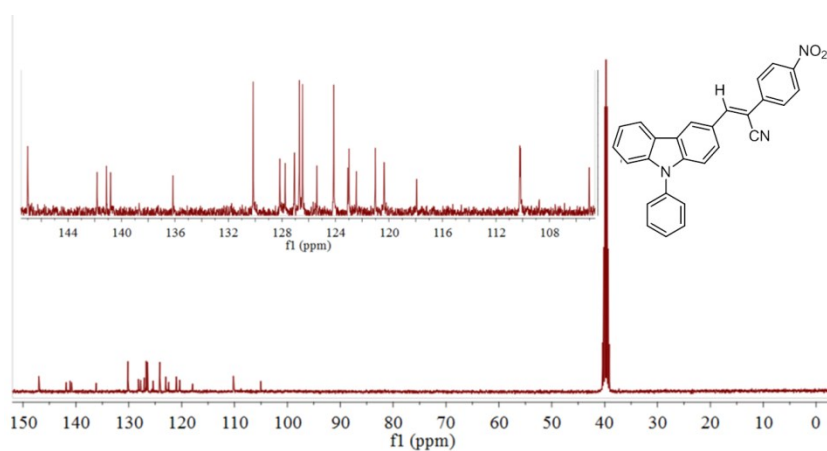

Fig. S8.  $^{13}\text{C}$  NMR spectra of 2c.

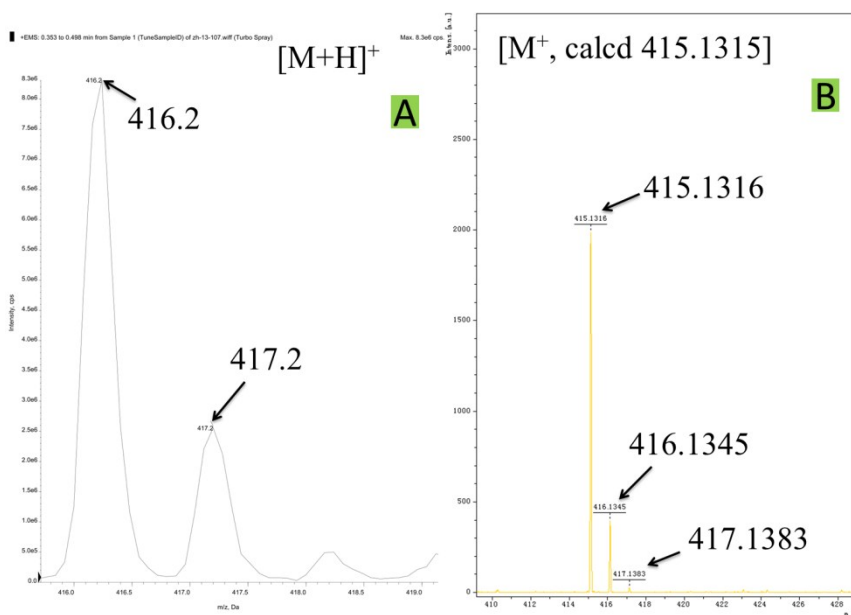

Fig. S9. (A) LRMS and (B) HRMS spectra of 2c.

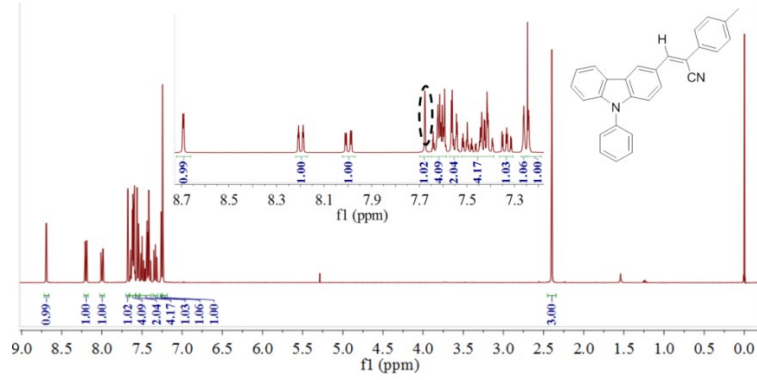

Fig. S10.  $^1\text{H}$  NMR spectra of 2d.

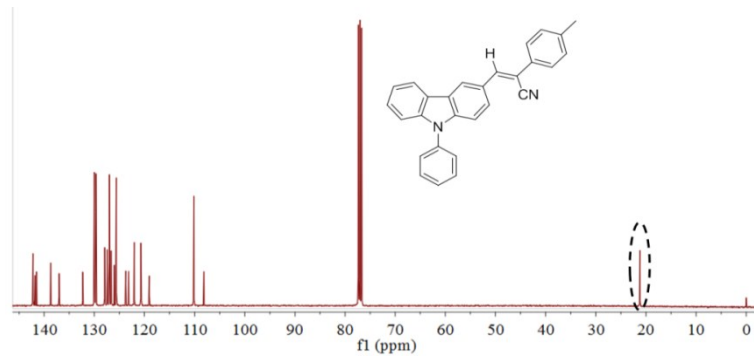

Fig. S11.  $^{13}\text{C}$  NMR spectra of 2d.

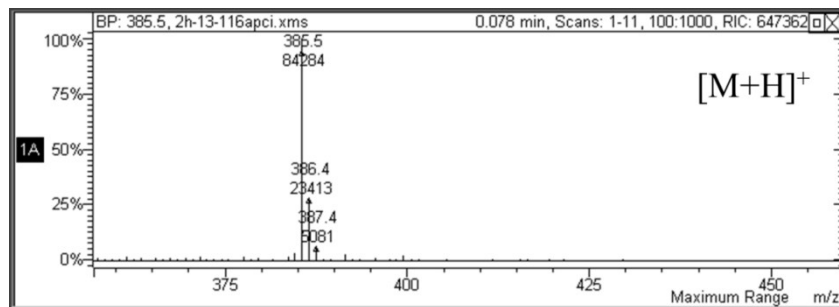

Fig. S12. LRMS spectra of 2d.

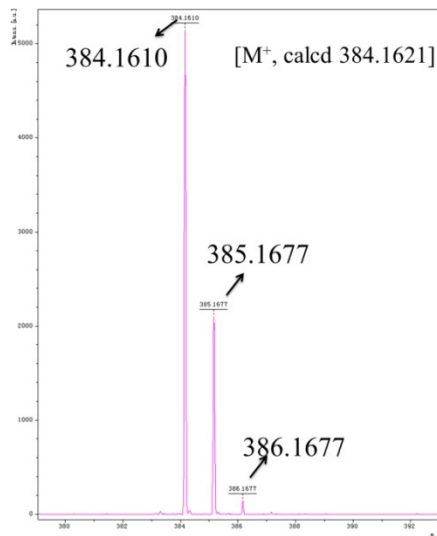

Fig. S13. HRMS spectra of 2d.

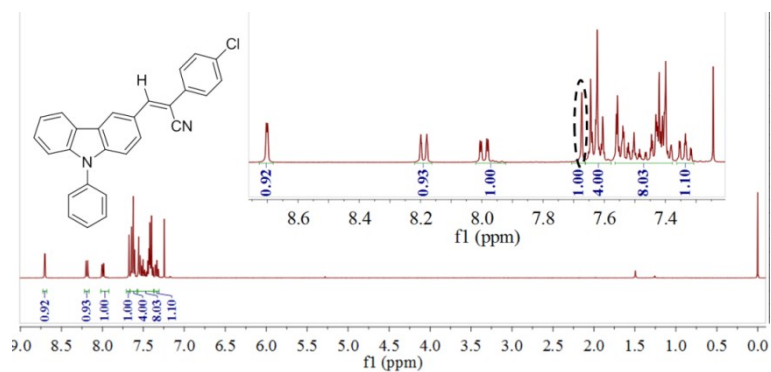

Fig. S14.  $^1\text{H}$  NMR spectra of 2e.

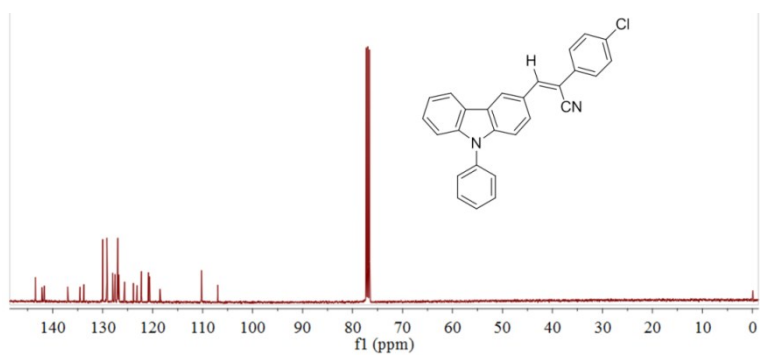

Fig. S15.  $^{13}\text{C}$  NMR spectra of 2e.

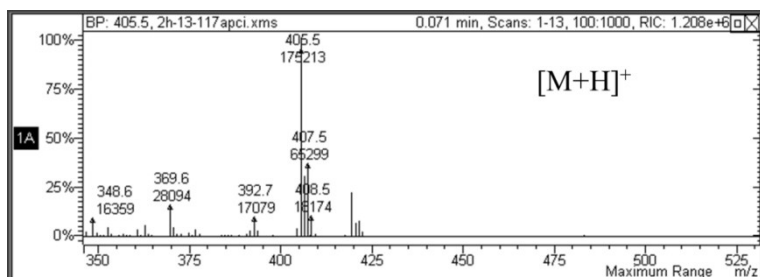

Fig. S16. LRMS spectra of 2e.

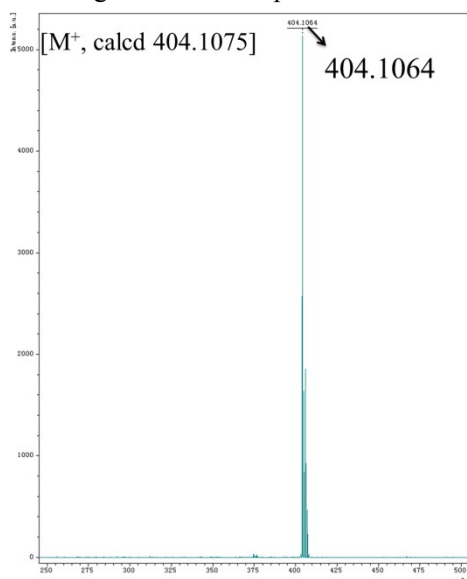

Fig. S17. HRMS spectra of 2e.

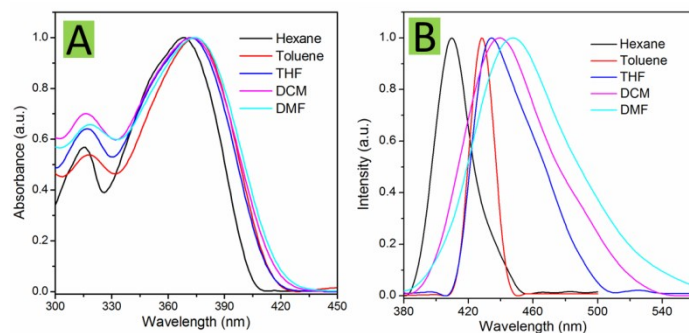

Fig. S18. Normalised (A) absorption and (B) emission spectra of 2a in various organic solvents.

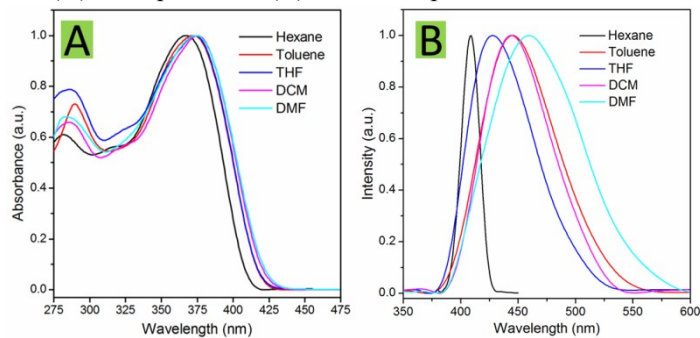

Fig. S19. Normalised (A) absorption and (B) emission spectra of 2b in various organic solvents.

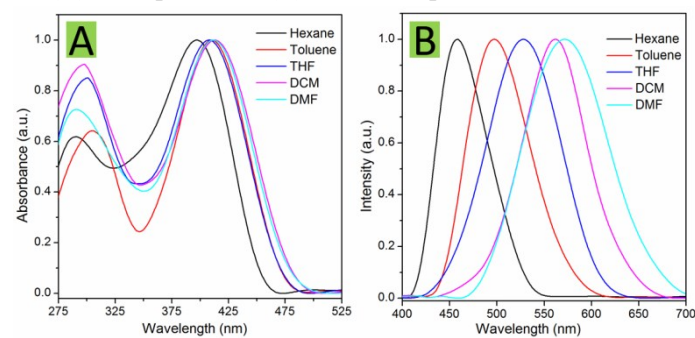

Fig. S20. Normalised (A) absorption and (B) emission spectra of 2c in various organic solvents.

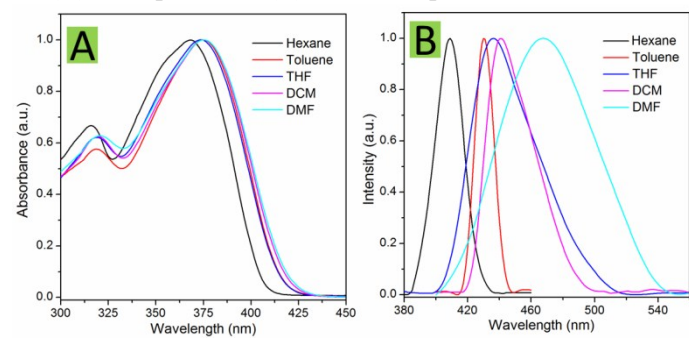

Fig. S21. Normalised (A) absorption and (B) emission spectra of 2d in various organic solvents.

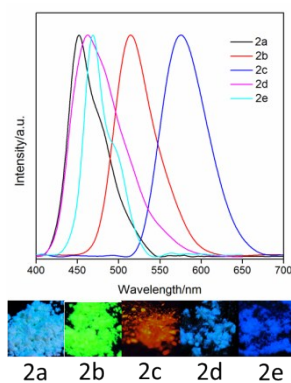

Fig. S22. Fluorescent emission spectra of the as-prepared 2a-2e and photographs of the powder of the as-prepared 2a-2e under 365 nm UV light.

Table S1 Photophysical properties of 2a-2e.

| Compound | $\lambda_{\text{abs}}^{\text{a}}$ (nm) | $\lambda_{\text{em}}^{\text{a}}$ (nm) | Stokes shift (nm) | $\lambda_{\text{em}}^{\text{b}}$ (nm) | $E_{\text{g}}^{\text{c}}$ (eV) |
|----------|----------------------------------------|---------------------------------------|-------------------|---------------------------------------|--------------------------------|
| 2a       | 316, 372                               | 439                                   | 67                | 452, 507 <sup>d</sup>                 | 3.11                           |
| 2b       | 286, 375                               | 444                                   | 69                | 515                                   | 3.08                           |
| 2c       | 298, 413                               | 562                                   | 149               | 575                                   | 2.76                           |
| 2d       | 320, 375                               | 441                                   | 66                | 462, 581 <sup>d</sup>                 | 3.10                           |
| 2e       | 321, 380                               | 451                                   | 71                | 469, 579 <sup>d</sup>                 | 3.05                           |

<sup>a</sup>Measured in DCM. <sup>b</sup>Tested in solid state. <sup>c</sup>The optical band gap estimated from the onset wavelength of the absorption spectra in DCM. <sup>d</sup>The maximum emission wavelength of ground sample.

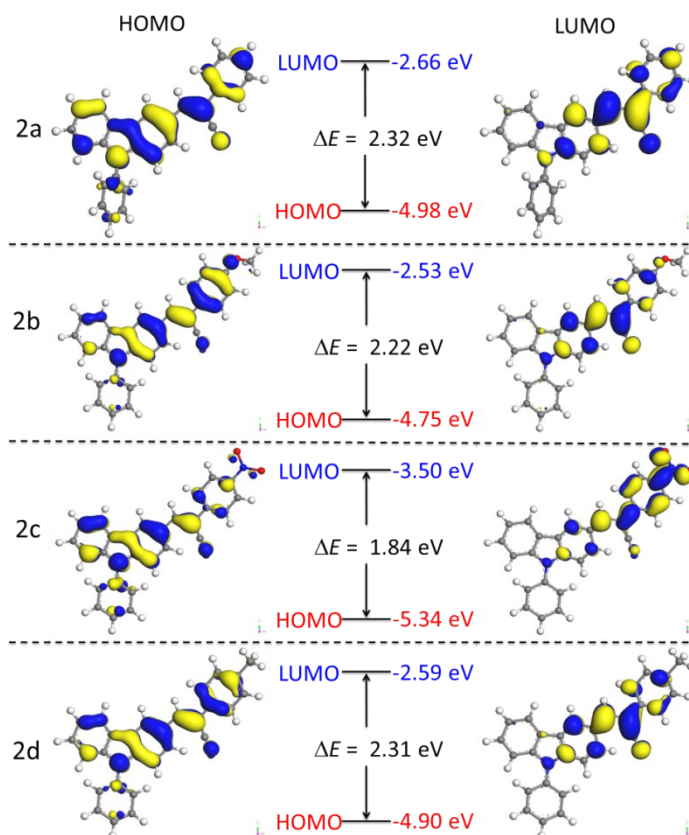

Fig. S23. B3LYP/6-31G(d) calculated molecular orbital amplitude plots of HOMO and LUMO levels for 2a-2d.

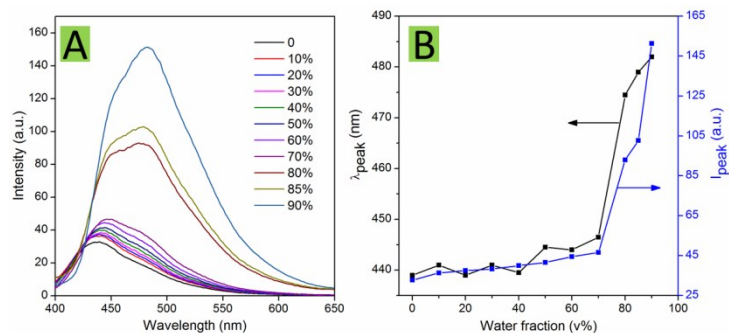

Fig. S24. (A) Emission spectra of 2a in THF and THF/water mixtures with varying water fractions ( $f_w$ ). (B) Plots of fluorescence peak location and intensity  $vs f_w$  for 2a. Concentration = 20  $\mu$ M; excitation wavelength = 360 nm.

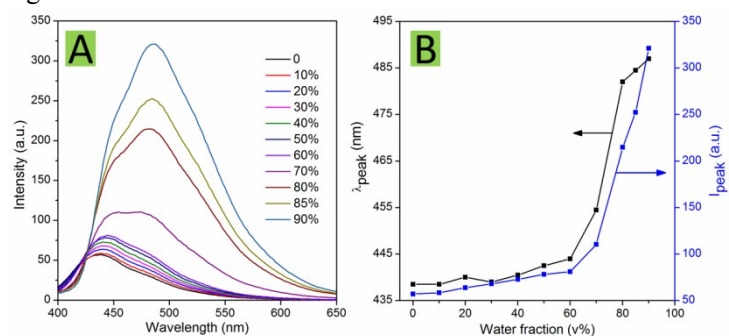

Fig. S25. (A) Emission spectra of 2b in THF and THF/water mixtures with varying water fractions ( $f_w$ ). (B) Plots of fluorescence peak location and intensity  $vs f_w$  for 2b. Concentration = 20  $\mu$ M; excitation wavelength = 360 nm.

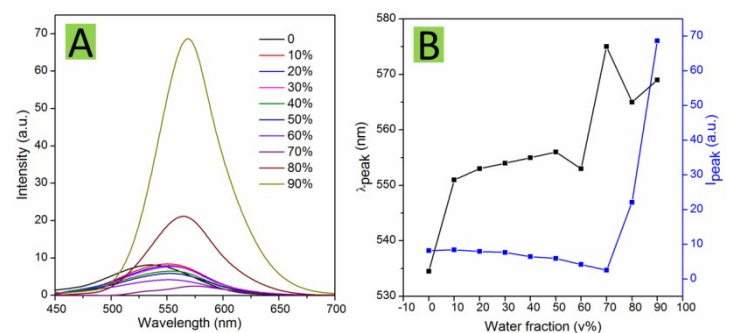

Fig. S26. (A) Emission spectra of 2c in THF and THF/water mixtures with varying water fractions ( $f_w$ ). (B) Plots of fluorescence peak location and intensity  $vs f_w$  for 2c. Concentration = 20  $\mu$ M; excitation wavelength = 360 nm.

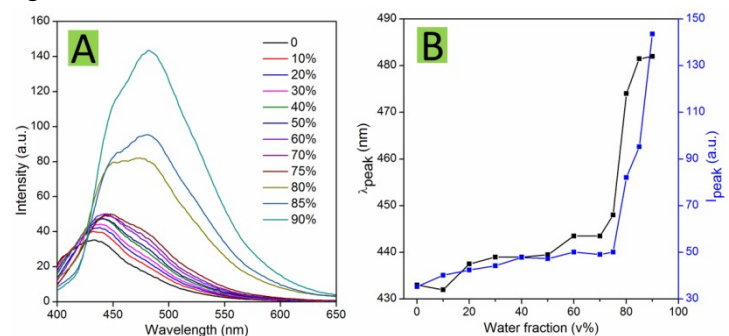

Fig. S27. (A) Emission spectra of 2d in THF and THF/water mixtures with varying water fractions ( $f_w$ ). (B) Plots of fluorescence peak location and intensity  $vs f_w$  for 2d. Concentration = 20  $\mu$ M; excitation wavelength = 360 nm.



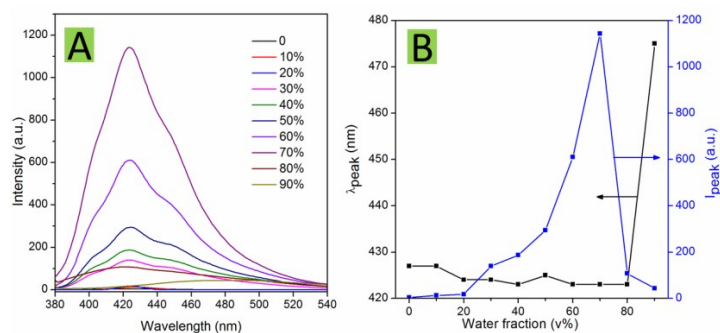

Fig. S28. (A) Emission spectra of 2a in THF and THF/water mixtures with varying water fractions ( $f_w$ ) and kept at room temperature above 2 h. (B) Plots of fluorescence peak location and intensity vs  $f_w$  for 2a. Concentration = 20  $\mu$ M; excitation wavelength = 360 nm.

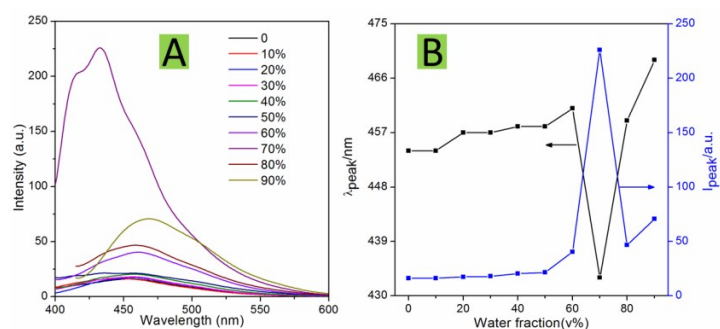

Fig. S29. (A) Emission spectra of 2b in THF and THF/water mixtures with varying water fractions ( $f_w$ ) and kept at room temperature above 2 h. (B) Plots of fluorescence peak location and intensity vs  $f_w$  for 2b. Concentration = 20  $\mu$ M; excitation wavelength = 360 nm.

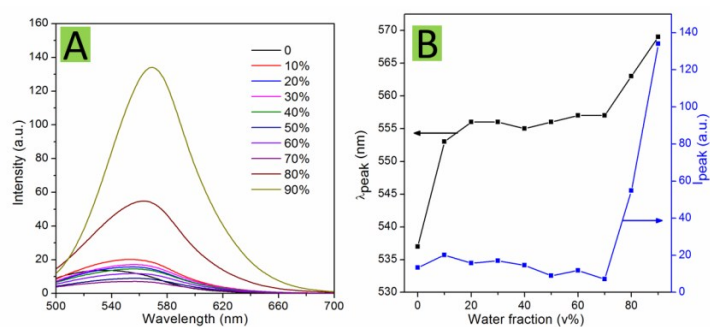

Fig. S30. (A) Emission spectra of 2c in THF and THF/water mixtures with varying water fractions ( $f_w$ ) and kept at room temperature above 2 h. (B) Plots of fluorescence peak location and intensity vs  $f_w$  for 2c. Concentration = 20  $\mu$ M; excitation wavelength = 360 nm.

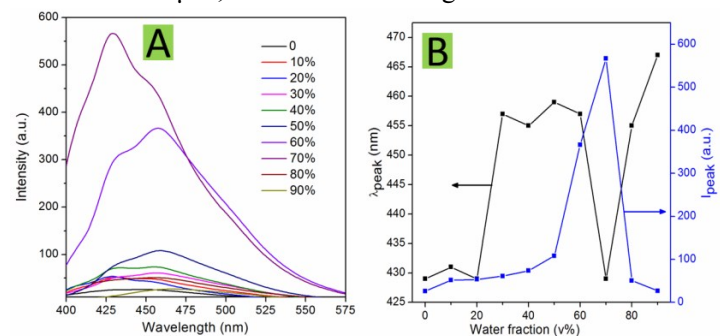

Fig. S31. (A) Emission spectra of 2d in THF and THF/water mixtures with varying water fractions ( $f_w$ ) and kept at room temperature above 2 h. (B) Plots of fluorescence peak location and intensity vs  $f_w$  for 2d. Concentration = 20  $\mu$ M; excitation wavelength = 360 nm.



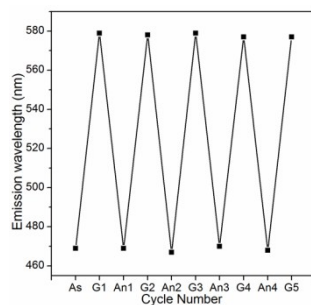

Fig. S32. Emission maxima of 2e during the grinding-annealing cycles. As = as prepared sample, G = ground sample; An= Annealing sample (annealing at 60 °C for 10 min). The numbers after G or An represent cycle numbers.

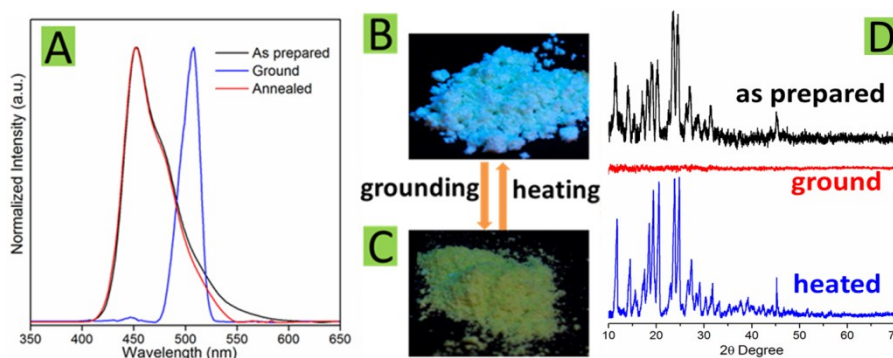

Fig. S33. (A) Emission spectra of the as prepared, ground and annealing 2a solids, (D) their XRD patterns and (B and C) their photographs taken under UV illumination.

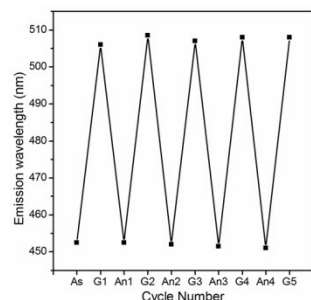

Fig. S34. Emission maxima of 2a during the grinding-annealing cycles. As = as prepared sample, G = ground sample; An= Annealing sample (annealing at 60 °C for 10 min). The numbers after G or An represent cycle numbers.

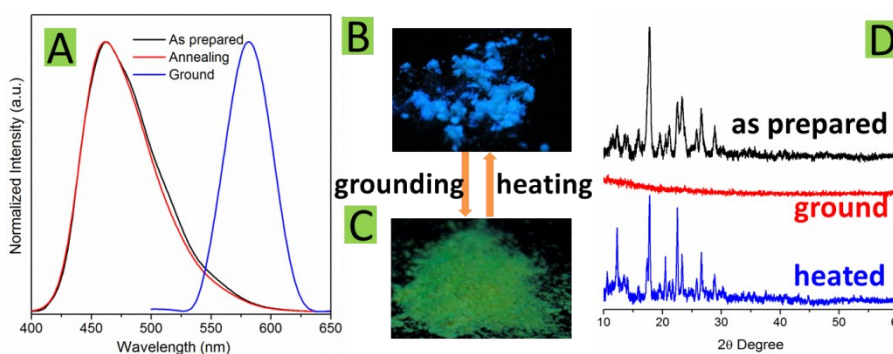

Fig. S35. (A) Emission spectra of the as prepared, ground and annealing 2d solids, (D) their XRD patterns and (B and C) their photographs taken under UV illumination.

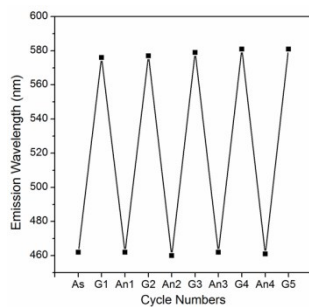

Fig. S36. Emission maxima of 2d during the grinding-annealing cycles. As = as prepared sample, G = ground sample; An= Annealing sample (annealing at 60 °C for 10 min). The numbers after G or An represent cycle numbers.

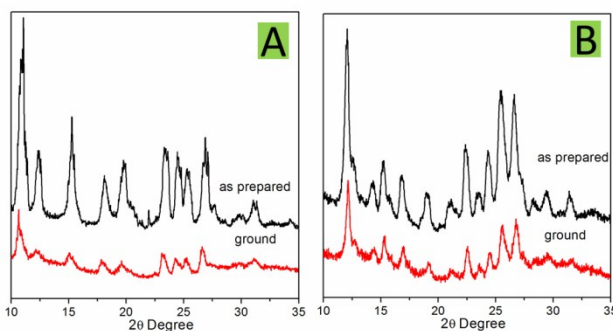

Fig. S37. XRD patterns of the as prepared and ground 2b (A) and 2c (B) solids.

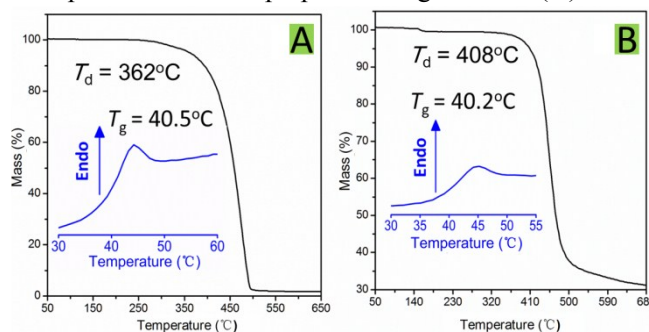

Fig. S38. TGA and DSC (inset) thermograms of 2a (A) and 2b (B) recorded under nitrogen atmosphere at the heating rate of 10 °C min<sup>-1</sup>.

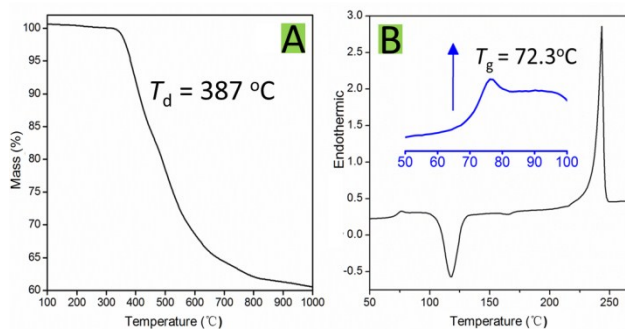

Fig. S39. (A) TGA thermograms of 2c recorded under nitrogen atmosphere at 10 °C min<sup>-1</sup> scan rates. (B) DSC curve of the as-prepared 2c.

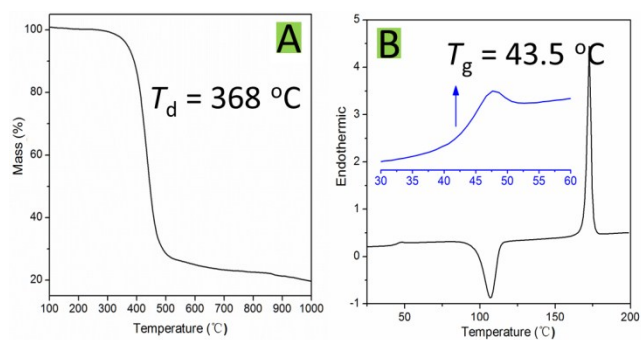

Fig. S40. (A) TGA thermograms of 2d recorded under nitrogen atmosphere at  $10\text{ °C min}^{-1}$  scan rates. (B) DSC curve of the as-prepared 2d.

Table S2 Crystal data and structure refinement for 2a.

---

|                                   |                                                                                                      |
|-----------------------------------|------------------------------------------------------------------------------------------------------|
| Identification code               | 2a                                                                                                   |
| Empirical formula                 | C <sub>27</sub> H <sub>18</sub> N <sub>2</sub>                                                       |
| Formula weight                    | 370.43                                                                                               |
| Temperature                       | 296.15 K                                                                                             |
| Wavelength                        | 0.71073 Å                                                                                            |
| Crystal system                    | Monoclinic                                                                                           |
| Space group                       | P 1 21/c 1                                                                                           |
| Unit cell dimensions              | a = 18.495(4) Å      α = 90°<br>b = 13.396(3) Å      β = 96.436(4)°<br>c = 7.8586(17) Å      γ = 90° |
| Volume                            | 1934.7(7) Å <sup>3</sup>                                                                             |
| Z                                 | 4                                                                                                    |
| Density (calculated)              | 1.272 Mg/m <sup>3</sup>                                                                              |
| Absorption coefficient            | 0.075 mm <sup>-1</sup>                                                                               |
| F(000)                            | 776                                                                                                  |
| Crystal size                      | 0.23 x 0.21 x 0.2 mm <sup>3</sup>                                                                    |
| Theta range for data collection   | 1.108 to 25.063°                                                                                     |
| Index ranges                      | -21 ≤ h ≤ 21, -15 ≤ k ≤ 15, -8 ≤ l ≤ 9                                                               |
| Reflections collected             | 11027                                                                                                |
| Independent reflections           | 3374 [R(int) = 0.0624]                                                                               |
| Completeness to theta = 25.063°   | 98.3 %                                                                                               |
| Absorption correction             | Semi-empirical from equivalents                                                                      |
| Max. and min. transmission        | 0.9852 and 0.9830                                                                                    |
| Refinement method                 | Full-matrix least-squares on F <sup>2</sup>                                                          |
| Data / restraints / parameters    | 3374 / 0 / 263                                                                                       |
| Goodness-of-fit on F <sup>2</sup> | 1.019                                                                                                |
| Final R indices [I > 2σ(I)]       | R1 = 0.0506, wR2 = 0.1193                                                                            |
| R indices (all data)              | R1 = 0.0839, wR2 = 0.1412                                                                            |
| Extinction coefficient            | 0.017(2)                                                                                             |
| Largest diff. peak and hole       | 0.215 and -0.223 e.Å <sup>-3</sup>                                                                   |

---

Table S3. Crystal data and structure refinement for 2b.

|                                   |                                                  |                            |
|-----------------------------------|--------------------------------------------------|----------------------------|
| Identification code               | 2b                                               |                            |
| Empirical formula                 | C <sub>28</sub> H <sub>20</sub> N <sub>2</sub> O |                            |
| Formula weight                    | 400.46                                           |                            |
| Temperature                       | 296.15 K                                         |                            |
| Wavelength                        | 0.71073 Å                                        |                            |
| Crystal system                    | Monoclinic                                       |                            |
| Space group                       | P 1 21/n 1                                       |                            |
| Unit cell dimensions              | a = 16.599(4) Å                                  | $\alpha = 90^\circ$        |
|                                   | b = 7.731(2) Å                                   | $\beta = 111.991(4)^\circ$ |
|                                   | c = 17.121(4) Å                                  | $\gamma = 90^\circ$        |
| Volume                            | 2037.1(9) Å <sup>3</sup>                         |                            |
| Z                                 | 4                                                |                            |
| Density (calculated)              | 1.306 Mg/m <sup>3</sup>                          |                            |
| Absorption coefficient            | 0.080 mm <sup>-1</sup>                           |                            |
| F(000)                            | 840                                              |                            |
| Crystal size                      | 0.21 x 0.2 x 0.19 mm <sup>3</sup>                |                            |
| Theta range for data collection   | 1.458 to 25.003°                                 |                            |
| Index ranges                      | -19 ≤ h ≤ 19, -8 ≤ k ≤ 9, -20 ≤ l ≤ 19           |                            |
| Reflections collected             | 9995                                             |                            |
| Independent reflections           | 3591 [R(int) = 0.0360]                           |                            |
| Completeness to theta = 25.003°   | 99.9 %                                           |                            |
| Absorption correction             | Semi-empirical from equivalents                  |                            |
| Max. and min. transmission        | 0.9850 and 0.9834                                |                            |
| Refinement method                 | Full-matrix least-squares on F <sup>2</sup>      |                            |
| Data / restraints / parameters    | 3591 / 0 / 280                                   |                            |
| Goodness-of-fit on F <sup>2</sup> | 1.021                                            |                            |
| Final R indices [I > 2σ(I)]       | R1 = 0.0425, wR2 = 0.1016                        |                            |
| R indices (all data)              | R1 = 0.0695, wR2 = 0.1188                        |                            |
| Extinction coefficient            | n/a                                              |                            |
| Largest diff. peak and hole       | 0.146 and -0.204 e.Å <sup>-3</sup>               |                            |

Table S4. Crystal data and structure refinement for 2c.

---

|                                   |                                                                                                  |
|-----------------------------------|--------------------------------------------------------------------------------------------------|
| Identification code               | 2c                                                                                               |
| Empirical formula                 | C <sub>27</sub> H <sub>17</sub> N <sub>3</sub> O <sub>2</sub>                                    |
| Formula weight                    | 415.43                                                                                           |
| Temperature                       | 296.15 K                                                                                         |
| Wavelength                        | 0.71073 Å                                                                                        |
| Crystal system                    | Monoclinic                                                                                       |
| Space group                       | P 1 21/c 1                                                                                       |
| Unit cell dimensions              | a = 17.245 (11) Å    α = 90°<br>b = 13.979(9) Å    β = 103.290(10)°<br>c = 8.714(6) Å    γ = 90° |
| Volume                            | 2044(2) Å <sup>3</sup>                                                                           |
| Z                                 | 4                                                                                                |
| Density (calculated)              | 1.350 Mg/m <sup>3</sup>                                                                          |
| Absorption coefficient            | 0.087 mm <sup>-1</sup>                                                                           |
| F(000)                            | 864                                                                                              |
| Crystal size                      | 0.21 x 0.2 x 0.19 mm <sup>3</sup>                                                                |
| Theta range for data collection   | 2.809 to 25.027°                                                                                 |
| Index ranges                      | -19 ≤ h ≤ 20, -16 ≤ k ≤ 14, -9 ≤ l ≤ 10                                                          |
| Reflections collected             | 10081                                                                                            |
| Independent reflections           | 3600 [R(int) = 0.1002]                                                                           |
| Completeness to theta = 25.027°   | 99.5 %                                                                                           |
| Refinement method                 | Full-matrix least-squares on F <sup>2</sup>                                                      |
| Data / restraints / parameters    | 3600 / 0 / 290                                                                                   |
| Goodness-of-fit on F <sup>2</sup> | 0.977                                                                                            |
| Final R indices [I > 2σ(I)]       | R1 = 0.0840, wR2 = 0.1974                                                                        |
| R indices (all data)              | R1 = 0.1883, wR2 = 0.2614                                                                        |
| Extinction coefficient            | 0.016(4)                                                                                         |
| Largest diff. peak and hole       | 0.328 and -0.262 e.Å <sup>-3</sup>                                                               |

---

Table S5. Crystal data and structure refinement for 2d.

|                                   |                                                |                 |
|-----------------------------------|------------------------------------------------|-----------------|
| Identification code               | 2d                                             |                 |
| Empirical formula                 | C <sub>28</sub> H <sub>20</sub> N <sub>2</sub> |                 |
| Formula weight                    | 384.46                                         |                 |
| Temperature                       | 296.15 K                                       |                 |
| Wavelength                        | 0.71073 Å                                      |                 |
| Crystal system                    | Monoclinic                                     |                 |
| Space group                       | P 1 21/c 1                                     |                 |
| Unit cell dimensions              | a = 16.517(4) Å                                | α = 90°         |
|                                   | b = 13.934(3) Å                                | β = 103.642(4)° |
|                                   | c = 9.048(2) Å                                 | γ = 90°         |
| Volume                            | 2023.7(8) Å <sup>3</sup>                       |                 |
| Z                                 | 4                                              |                 |
| Density (calculated)              | 1.262 Mg/m <sup>3</sup>                        |                 |
| Absorption coefficient            | 0.074 mm <sup>-1</sup>                         |                 |
| F(000)                            | 808                                            |                 |
| Crystal size                      | 0.27 x 0.25 x 0.22 mm <sup>3</sup>             |                 |
| Theta range for data collection   | 1.269 to 25.192°                               |                 |
| Index ranges                      | -19 ≤ h ≤ 19, -16 ≤ k ≤ 16, -10 ≤ l ≤ 8        |                 |
| Reflections collected             | 11762                                          |                 |
| Independent reflections           | 3637 [R(int) = 0.0602]                         |                 |
| Completeness to theta = 25.192°   | 99.9 %                                         |                 |
| Absorption correction             | Semi-empirical from equivalents                |                 |
| Max. and min. transmission        | 0.9839 and 0.9803                              |                 |
| Refinement method                 | Full-matrix least-squares on F <sup>2</sup>    |                 |
| Data / restraints / parameters    | 3637 / 0 / 273                                 |                 |
| Goodness-of-fit on F <sup>2</sup> | 0.954                                          |                 |
| Final R indices [I > 2σ(I)]       | R1 = 0.0516, wR2 = 0.1164                      |                 |
| R indices (all data)              | R1 = 0.1029, wR2 = 0.1429                      |                 |
| Extinction coefficient            | 0.0096(14)                                     |                 |
| Largest diff. peak and hole       | 0.213 and -0.149 e.Å <sup>-3</sup>             |                 |

Table S6. Crystal data and structure refinement for 2e.

---

|                                   |                                                                                                       |
|-----------------------------------|-------------------------------------------------------------------------------------------------------|
| Identification code               | 2e                                                                                                    |
| Empirical formula                 | C <sub>27</sub> H <sub>17</sub> Cl N <sub>2</sub>                                                     |
| Formula weight                    | 404.88                                                                                                |
| Temperature                       | 296.15 K                                                                                              |
| Wavelength                        | 0.71073 Å                                                                                             |
| Crystal system                    | Monoclinic                                                                                            |
| Space group                       | P 1 21/c 1                                                                                            |
| Unit cell dimensions              | a = 16.672(12) Å      α = 90°<br>b = 13.929(10) Å      β = 102.965(8)°<br>c = 8.865(6) Å      γ = 90° |
| Volume                            | 2006(2) Å <sup>3</sup>                                                                                |
| Z                                 | 4                                                                                                     |
| Density (calculated)              | 1.340 Mg/m <sup>3</sup>                                                                               |
| Absorption coefficient            | 0.207 mm <sup>-1</sup>                                                                                |
| F(000)                            | 840                                                                                                   |
| Crystal size                      | 0.21 x 0.2 x 0.19 mm <sup>3</sup>                                                                     |
| Theta range for data collection   | 1.926 to 25.008°                                                                                      |
| Index ranges                      | -19 ≤ h ≤ 19, -16 ≤ k ≤ 16, -10 ≤ l ≤ 10                                                              |
| Reflections collected             | 15755                                                                                                 |
| Independent reflections           | 3546 [R(int) = 0.0273]                                                                                |
| Completeness to theta = 25.008°   | 100.0 %                                                                                               |
| Absorption correction             | Semi-empirical from equivalents                                                                       |
| Refinement method                 | Full-matrix least-squares on F <sup>2</sup>                                                           |
| Data / restraints / parameters    | 3546 / 0 / 271                                                                                        |
| Goodness-of-fit on F <sup>2</sup> | 1.132                                                                                                 |
| Final R indices [I > 2σ(I)]       | R1 = 0.0388, wR2 = 0.1068                                                                             |
| R indices (all data)              | R1 = 0.0541, wR2 = 0.1262                                                                             |
| Extinction coefficient            | n/a                                                                                                   |
| Largest diff. peak and hole       | 0.169 and -0.266 e.Å <sup>-3</sup>                                                                    |

---



## References

1. R. Lygaitis, J. V. Grazulevicius and V. Jankauskas, *Mol Cryst Liq Cryst*, 2011, **536**, 182/[414]-191/[423].
2. Y. Zhang, G. Zhuang, M. Ouyang, B. Hu, Q. Song, J. Sun, C. Zhang, C. Gu, Y. Xu and Y. Ma, *Dyes Pigments*, 2013, **98**, 486-492.
3. S. S. Kulp and C. B. Caldwell, *The Journal of Organic Chemistry*, 1980, **45**, 171-173.
